# Supplementary material for: Autophagy-dependent ribosomal RNA degradation is essential for maintaining nucleotide homeostasis during C. elegans development
Source: eLife. 2018 Aug 13;7:e36588. doi: 10.7554/eLife.36588 (PMC6101943; doi:10.7554/eLife.36588)
Supplement: Figure 1—source data 1. [file elife-36588-fig1-data1.xlsx]

## Sheet: Figure 1M--Lysosome volume
Avervage volume of lysosomes (µm3)
	WT										rnst-2(qx245)										rnst-2(bp555)
4F	0.759567	0.870481	0.743023	1.05629	0.878251	0.56358	0.847456	0.589125	0.694758	0.718404	2.54296	3.27684	2.60175	2.1287	2.73139	2.43668	2.75593	3.57405	3.36992	3.11235	2.85292	2.93626	3.42073	3.32082	3.53533	3.45383	2.81095	3.66089	2.73089	3.74252
L1	0.851936	0.803786	0.751045	0.725733	0.72677	0.671214	0.885185	0.649544	0.746793	0.756928	2.72258	3.79426	2.6651	2.94588	2.77348	2.92535	3.08028	2.18953	3.10459	2.86191	3.01822	3.36314	3.91608	3.33086	2.89706	3.31096	3.0385	3.19113	3.13251	2.79639
Adult/Day3	2.36824	1.84903	2.5678	2.57878	2.45507	1.87459	0.982603	2.12102	3.1307	1.29403	4.99091	5.30806	4.59687	6.28109	5.70417	6.31511	5.26724	5.8248	7.28703	5.13651	4.08822	6.87742	7.40077	5.15535	5.38762	6.32179	6.62238	5.92703	8.98039	4.14268
The numerical data are analyzed by GraphPad Prism 5 and represented as a bar graph in Figure 1M.

## Sheet: Figure 1N-Lysotracker staining
% of LAAT-1::GFP-positive structures stained by LysoTracker red
WT	rnst-2(qx245)	rnst-2(bp555)
28.8372	30.6667	35.3846
33.0677	42.4051	65.3179
35.5	47.9769	55.4348
54.4554	44.7368	61.1511
34.127	40.7583	73.3333
69.6429	31.9527	27.4809
91.0714	51.2563	58.547
28.5714	83.3333	75.8929
52.2472	51.9868	37.0031
46.5753	42.2164	34.6939
59.0604	60.1504	27.6364
	55.9701
The numerical data are analyzed by GraphPad Prism 5 and represented as a bar graph in Figure 1N.
