# Supplementary material for: Autophagy-dependent ribosomal RNA degradation is essential for maintaining nucleotide homeostasis during C. elegans development
Source: eLife. 2018 Aug 13;7:e36588. doi: 10.7554/eLife.36588 (PMC6101943; doi:10.7554/eLife.36588)
Supplement: Figure 1—source data 2. [file elife-36588-fig1-data2.xlsx]

## Sheet: Figure1-S1P-Lysosome volume
Avervage volume of lysosomes (µm3)
	WT										rnst-2(qx245)										rnst-2(bp555)
4 F	0.552133	0.895559	0.721201	0.602699	0.664362	0.655594	0.918288	0.863501	0.596584	0.692886	3.09783	3.25157	2.95881	2.73123	3.51882	2.79223	3.26806	3.94527	3.73617	3.12047	2.61789	3.54142	3.74026	3.95255	3.95343	2.3747	3.47659	3.62832	2.95465	4.04832
L1	0.859168	0.807456	0.788551	0.64209	0.850775	0.692854	0.647233	0.673122	0.69718	0.79098	3.63084	2.65037	3.57653	4.06164	3.52915	3.96492	3.45314	2.84114	3.13144	2.84254	2.56103	2.93059	2.51946	3.30659	4.10409	2.83758	2.76117	4.72453	3.36539	4.47322
Adult/day3	1.67252	2.16565	2.08319	2.62166	1.97301	1.77176	1.8036	2.67114	1.83978	1.94734	5.59312	6.48142	7.54477	7.28837	8.4545	6.92404	7.70729	6.87621	7.63311	5.8411	6.51339	9.30773	8.24486	6.33142	7.05738	6.822	6.91545	7.2959	7.11459	7.39277
The numerical data are analyzed by GraphPad Prism 5 and represented as a bar graph in Figure 1-figure supplement 1P.

## Sheet: Figure1-S1Q-Lysosome volume
Avervage volume of lysosomes (µm3)
		WT															rnst-2(qx245)
before comma	1	0.456112	0.736895	0.40058	0.509451	0.817457	0.654993	0.51584	0.629683	0.574845	0.784775	0.445058	0.395604				0.448309	0.45517	0.436714	0.344456	0.54798	0.632949	0.524603	0.656233	0.543991	0.482594	0.629276	0.542667
2F	2	0.491288	0.536362	0.553123	0.713361	0.726159	0.436084	0.483037	0.475834	0.37193	0.478269	0.761117	0.494589				0.904538	0.565267	1.15262	0.740139	0.89991	0.560026	0.541224	0.626086	0.794922	0.3972	0.870806	0.881042
4F	3	0.552133	0.895559	0.721201	0.602699	0.664362	0.655594	0.918288	0.863501	0.596584	0.692886						3.09783	3.25157	2.95881	2.73123	3.51882	2.79223	3.26806	3.94527	3.73617	3.12047
L1	4	0.859168	0.807456	0.788551	0.64209	0.850775	0.692854	0.647233	0.673122	0.69718	0.79098						3.63084	2.65037	3.57653	4.06164	3.52915	3.96492	3.45314	2.84114	3.13144	2.84254
L2	5	0.742286	1.81968	1.47057	1.57815	1.34752	0.648109	1.02617	1.56663	1.27402	1.36755	0.721149	1.25596	0.89545	1.38099		2.74298	7.89097	4.88192	5.93108	2.73175	5.14235	5.34214	2.58419	3.99419	5.06248	2.71153	3.36203
L3	6	1.41118	1.14264	1.3689	1.41183	1.67015	1.62356	2.98732	1.49852	1.85861	1.63385						2.96959	3.10781	3.53352	2.06887	6.55021	3.11931	3.12111	2.52763	2.43839	2.82773	4.64667
L4	7	5.23107	3.19917	5.70878	1.81171	3.46017	1.55319	4.20133	2.10128	3.72542	3.68693	3.62464	5.64944				2.9653	2.72362	3.75285	4.2922	3.48612	2.91284	3.97699	3.06055	4.14412	4.70907
Day 1	8	3.57081	5.02036	5.08619	3.57877	4.55405	3.09716	3.88879	4.40181	4.50342	3.23371	4.18195	4.8058				6.09427	4.05141	7.67242	4.45874	6.7376	4.6734	6.08508	6.29007	5.9256	8.5505
Day 3	9	1.67252	2.16565	2.08319	2.62166	1.97301	1.77176	1.8036	2.67114	1.83978	1.94734						5.59312	6.48142	7.54477	7.28837	8.4545	6.92404	7.70729	6.87621	7.63311	5.8411
Day 5	10	4.26147	2.39686	3.38755	3.3604	2.62743	4.1676	2.33359	3.49683	2.96626	2.30482	3.1481	3.44232	2.5853			10.5426	15.0131	16.8084	16.2883	12.9772	15.8787	15.8088	8.42206	8.30808	13.5681
Day 7	11	3.87059	3.07576	3.50094	4.48722	3.27018	3.95199	2.24316	3.79804	3.3562	2.37347						15.2429	16.1997	12.1472	11.7858	8.93875	14.6393	14.5155	11.6432	15.4707	13.41	12.2035	12.5204	8.83406	13.8442
The numerical data are analyzed by GraphPad Prism 5 and represented as a bar graph in Figure 1-figure supplement 1Q.

## Sheet: Figure1-S1R-Lysotracker
Volume of Lysotracler-stained vs LAAT-1::GFP-positive structures
WT	rnst-2(qx245)	rnst-2(bp555)
79.8966	67.3745	55.6474
22.4672	53.7097	80.7886
52.5744	70.0377	84.5281
74.8264	57.0903	80.6468
93.1638	33.1737	73.2282
41.895	50.3592	92.8172
70.7932	75.867	42.4474
71.1271	70.8339	59.9046
64.8386	55.1951	63.5649
70.9634	93.6613	87.3526
44.6254	93.6793	30.6276
The numerical data are analyzed by GraphPad Prism 5 and represented as a bar graph in Figure 1-figure supplement 1R.
