# Supplementary material for: Autophagy-dependent ribosomal RNA degradation is essential for maintaining nucleotide homeostasis during C. elegans development
Source: eLife. 2018 Aug 13;7:e36588. doi: 10.7554/eLife.36588 (PMC6101943; doi:10.7554/eLife.36588)
Supplement: Figure 3—source data 1. [file elife-36588-fig3-data1.xlsx]

## Sheet: Figure3A-Right-RNA
Normalized RNA accumulation
WT	rnst-2(qx245)	rnst-2(qx245)+RNST-2
1	5.49	1.02
1	4.95	0.82
1	7.13	0.89
The numerical data are analyzed by GraphPad Prism 5 and represented as a bar graph in Figure 3A.

## Sheet: Figure3C-Right-RNA
Normalized RNA accumulation
WT	atg-2(bp576)	rnst-2(qx245)	rnst-2(qx245);atg-2(bp576)
1	0.643	4.78	0.65
1	0.428	6	0.44
1	0.56	4.5	0.73
1	0.99	5.26	1.24
The numerical data are analyzed by GraphPad Prism 5 and represented as a bar graph in Figure 3C.

## Sheet: Figure3I-Lysosome volume
Avervage volume of lysosomes (µm3)
WT	atg-2(bp576)	rnst-2(qx245)	rnst-2(qx245);atg-2(bp576)
0.851936	0.514566	2.72258	1.20012
0.803786	0.570429	3.79426	1.32544
0.751045	0.609481	2.6651	1.5935
0.725733	0.561967	2.94588	1.08054
0.72677	0.629871	2.77348	1.36896
0.756928	0.628344	2.92535	1.43662
0.671214	0.593831	3.08028	1.00118
0.885185	0.497682	2.18953	1.7347
0.649544	0.734296	3.10459	1.60101
0.746793	0.653564	2.86191	1.26024
The numerical data are analyzed by GraphPad Prism 5 and represented as a bar graph in Figure 3I.
