# Supplementary material for: Autophagy-dependent ribosomal RNA degradation is essential for maintaining nucleotide homeostasis during C. elegans development
Source: eLife. 2018 Aug 13;7:e36588. doi: 10.7554/eLife.36588 (PMC6101943; doi:10.7554/eLife.36588)
Supplement: Figure 3—source data 2. [file elife-36588-fig3-data2.xlsx]

## Sheet: Figure3-S1C-Right-RNA
Normalized RNA accumulation
WT	rnst-2(bp555)
1	2.44
1	6.36
1	7.06
0.999	6.28
The numerical data are analyzed by GraphPad Prism 5 and represented as a bar graph in Figure 3-figure supplement 1C.

## Sheet: Figure3-S1E-Right-RNA
Normalized RNA accumulation
WT	epg-6(bp242)	rnst-2(qx245)	epg-6(bp242);rnst-2(qx245)
1	0.53	10.46	1.53
1	0.76	7.13	1.22
1	0.97	4.84	3.03
The numerical data are analyzed by GraphPad Prism 5 and represented as a bar graph in Figure 3-figure supplement 1E.

## Sheet: Figure3-S1M-Lysosome volume
Avervage volume of lysosomes (µm3)
WT	rnst-2(qx245)	epg-6(bp242)	epg-6(bp242);rnst-2(qx245)	lgg-1(bp500)	lgg-1(bp500);rnst-2(qx245)
0.859168	3.63084	0.827937	0.87296	0.651006	1.94434
0.807456	2.65037	0.781962	0.955678	0.66302	1.6478
0.788551	3.57653	0.635266	1.14406	0.886918	1.3364
0.64209	4.06164	0.708384	1.04615	0.634002	1.50513
0.850775	3.52915	0.745231	0.996358	0.732592	1.14741
0.692854	3.96492	0.721239	0.92025	0.746241	2.17216
0.647233	3.45314	0.84269	1.3111	0.595464	1.58665
0.673122	2.84114	0.589586	1.29646	0.62605	1.39057
0.69718	3.13144	0.681999	1.01029	0.619537	1.73656
0.79098	2.84254	0.637339	1.08998	0.725345	1.6714
The numerical data are analyzed by GraphPad Prism 5 and represented as a bar graph in Figure 3-figure supplement 1M.
