# Supplementary material for: Autophagy-dependent ribosomal RNA degradation is essential for maintaining nucleotide homeostasis during C. elegans development
Source: eLife. 2018 Aug 13;7:e36588. doi: 10.7554/eLife.36588 (PMC6101943; doi:10.7554/eLife.36588)
Supplement: Figure 3—source data 3. [file elife-36588-fig3-data3.xlsx]

## Sheet: Figure3-S2I-Cell corpses
No. of cell corpses
	WT																rnst-2(qx245)
comma	6	6	7	6	7	7	6	7	9	6	6	8	7	6	8		11	9	11	6	7	7	5	4	6	7	5	6	7	6	5
1.5 F	5	9	6	7	5	6	8	5	9	6	8	7	8	6	6	9	8	5	6	6	7	7	8	7	4	8	5	7	8
2 F	5	5	4	7	4	6	4	4	6	6	10	3	4	4	5		9	11	7	11	6	3	6	5	6	5	4	4	5
2.5 F	2	3	6	4	3	3	3	2	4	5	3	4	5	3	4		3	7	5	4	4	4	7	3	4	2	5	4	3
4 F	0	0	0	0	0	1	0	1	0	0	1	1	0	1	0		3	2	1	1	3	1	4	0	3	2	2	1	1	0	2
The numerical data are analyzed by GraphPad Prism 5 and represented as a bar graph in Figure 3-figure supplement 2I.

## Sheet: Figure3-S2J-Germ cell corpses
No. of germ cell corpses
WT	rnst-2(qx245)
10	5
11	8
8	11
11	11
6	6
10	4
13	13
12	7
12	14
6	6
12	8
10	9
11	8
8	11
8	13
13
10
7
The numerical data are analyzed by GraphPad Prism 5 and represented as a bar graph in Figure 3-figure supplement 2J.
