# Supplementary material for: Autophagy-dependent ribosomal RNA degradation is essential for maintaining nucleotide homeostasis during C. elegans development
Source: eLife. 2018 Aug 13;7:e36588. doi: 10.7554/eLife.36588 (PMC6101943; doi:10.7554/eLife.36588)
Supplement: Figure 4—source data 1. [file elife-36588-fig4-data1.xlsx]

## Sheet: Figure4U-L1 survival -Left
% of viable animals
	WT	rnst-2(qx245)	rnst-2(qx245)+RNST-2	rnst-2(bp555)	rnst-2(bp555)+RNST-2
0	100	100	100	100	100
2	109.389	82.933	99.5523	77.3138	96.4435
4	101.191	64.4225	95.9276	71.7833	92.5732
6	99.0328	62.2247	95.9519	56.6591	90.795
8	93.421	45.2301	91.4445	51.4673	89.1213
10	95.5517	17.7337	97.2183	37.0203	88.424
12	88.0452	9.31034	90.1422	35.6659	72.3849
14	80.887	15.4454	78.1325	37.1332	73.9191
16	75.3561	8.37064	77.1844	12.7539	73.3612
18	63.1291	2.57738	56.3696	9.14221	55.0209
20	42.0049	2.15391	45.568	4.74041	51.1506
22	41.7728	2.30238	30.8802	2.0316	48.5356
24	39.8532	2.69712	21.2909	1.693	50.2092
26	29.3179	0.287356	14.4069	0.451467	8.57741
28	25.4733	0.864842	17.8286	0	7.63598
30	14.2452	0.287356	8.00658		8.3682
32	11.6384	0.423977	4.34536		7.00837
34	4.14667	0	4.23148		6.58996
36	4.69655		2.29024		0
38	4.20931		3.03186		8.68201
40	2.45986		1.05758		1.04602
42	2.653		0.443913		0
44	1.82258		0.455692
46	3.06613		1.04049
48	1.08971		2.13758
50	0.996162		0.157978
52	0		0
The numerical data are analyzed by GraphPad Prism 5 and represented as a graph in Figure 4U (left panel).

## Sheet: Figure4U- Mean lifespan-Right
Mean life span of L1 larvae (days)
WT	rnst-2(qx245)	rnst-2(qx245)+RNST-2	rnst-2(bp555)	rnst-2(bp555)+RNST-2
22.98	8.18	23.94	10.18	22.99
25.27	7.33	21.03	9.3	22.83
24.24	11.13	23.19	10.08	23.12
22.73	10.4			23.22
19.33
The numerical data are analyzed by GraphPad Prism 5 and represented as a bar graph in Figure 4U (right panel).
