# Supplementary material for: Autophagy-dependent ribosomal RNA degradation is essential for maintaining nucleotide homeostasis during C. elegans development
Source: eLife. 2018 Aug 13;7:e36588. doi: 10.7554/eLife.36588 (PMC6101943; doi:10.7554/eLife.36588)
Supplement: Figure 5—source data 1. [file elife-36588-fig5-data1.xlsx]

## Sheet: Figure 5A-embryonic development
% of viable embryos
	WT	rnst-2(qx245)	rnst-2(bp555)
11	14.44	15.38	3.5
12	44.39	10.26	3.5
13	33.69	12.82	0
14	6.42	9.62	10.53
15	0.53	8.33	14.04
16	0	15.39	12.28
17	0	10.26	5.26
18	0.53	7.05	10.53
19	0	3.21	1.75
20	0	1.282	5.26
21	0	1.282	1.75
22	0	1.92	7.02
23	0	1.28	5.26
24	0	1.28	1.75
The numerical data are analyzed by GraphPad Prism 5 and represented as a bar graph in Figure 5A.

## Sheet: Figure 5B-Embryonic letahlity
% of viable embryos
WT	rnst-2(qx245)	rnst-2(bp555)
99.34	81.9	77.44
100	84.38	69.43
98	86.11	71.77
The numerical data are analyzed by GraphPad Prism 5 and represented as a bar graph in Figure 5B.

## Sheet: Figure 5C-Larval development
% of L1 larvae growing to L4
WT	rnst-2(qx245)	rnst-2(qx245)+RNST-2	rnst-2(bp555)	rnst-2(bp555)+RNST-2
90.03	45.71	86.1	54	99
100	49.1	98.2	63	100
83.12	52.63	85.91	50	100
99	64	95
100	62	85
The numerical data are analyzed by GraphPad Prism 5 and represented as a bar graph in Figure 5C.

## Sheet: Figure 5D-lifespan
% of viable worms (20℃)
	WT	rnst-2(qx245)	daf-2(e1370)	daf-2(e1370);rnst-2(qx245)
0	100	100	100	100.69
2	100	100	100	98.6207
4	100	87.67	99.29	81.3793
6	97.48	73.97	96.43	71.7241
8	89.08	63.01	93.57	60
10	71.43	44.52	93.57	50.3448
12	59.66	31.51	92.86	40
14	50.42	28.08	89.29	38.6207
16	44.54	26.03	87.14	32.4138
18	41.18	19.18	86.43	28.2759
20	28.57	14.38	82.86	26.2069
22	16.81	6.85	81.43	23.4483
24	10.92	3.42	80.71	22.069
26	4.2	2.05	77.14	21.3793
28	2.52	0.68	76.43	19.3103
30	0.84	0	75.71	18.6207
32	0.84		74.29	16.5517
34	0		71.43	15.8621
36			70	11.0345
38			67.14	4.13793
40			62.86	2.75862
42			60.71	2.06896
44			58.57	2.06896
46			57.14	0.689655
48			51.43	0.689655
50			45.71	0.689655
52			40.71	0.689655
54			36.43	0.689655
56			29.29	0.689655
58			23.57	0.689655
60			17.14	0.689655
62			14.29	0.689655
64			8.57	0.689655
66			6.43	0
68			4.29
70			2.14
72			0.71
74			0.71
76			0
The numerical data are analyzed by GraphPad Prism 5 and represented as a graph in Figure 5D.

## Sheet: Figure 5E-Meanlifespan
Mean lifespan (days) 20℃
WT	rnst-2(qx245)	daf-2(e1370)	daf-2(e1370);rnst-2(qx245)
17	10.9	43.29	20.37
16.78	12.67	37.67	15.78
16.76	10.5	38.57	17.31
16.37	11.6
	12.03
The numerical data are analyzed by GraphPad Prism 5 and represented as a bar graph in Figure 5E.

## Sheet: Figure 5F-Lifespan of glp-1
% of viable worms (25℃)
	WT	rnst-2(qx245)	glp-1(e2144)	glp-1(e2144);rnst-2(qx245)
0	100	100	100	100
2	100	99.3289	100	100
4	96.4539	95.302	100	94.6667
6	87.234	84.5638	95.8042	88
8	80.1419	55.0336	87.4126	82.6667
10	70.922	34.8993	82.5175	71.3333
12	63.8298	16.7785	79.7203	44
14	39.7163	4.69799	68.5315	9.33333
16	10.6383	0	53.8462	2
18	0		40.5594	2
20			16.0839	0.666667
22			6.29371	0
24			1.3986
26			0
The numerical data are analyzed by GraphPad Prism 5 and represented as a graph in Figure 5F.

## Sheet: Figure5G-Mean lifespan of glp-1
Mean lifespan (days) 25℃
WT	rnst-2(qx245)	glp-1(e2144)	glp-1(e2144);rnst-2(qx245)
13.37	10.35	16.63	11.89
12.98	9.81	16.93	12.04
12.73	9.54	16.28	11.39
The numerical data are analyzed by GraphPad Prism 5 and represented as a bar graph in Figure 5G.
