# Supplementary material for: Autophagy-dependent ribosomal RNA degradation is essential for maintaining nucleotide homeostasis during C. elegans development
Source: eLife. 2018 Aug 13;7:e36588. doi: 10.7554/eLife.36588 (PMC6101943; doi:10.7554/eLife.36588)
Supplement: Figure 6—source data 1. [file elife-36588-fig6-data1.xlsx]

## Sheet: Figure6A-Embryonic lethality
% of viable embryos
WT	pyr-1(cu8);rnst-2(qx245)	rnst-2(qx245)	pyr-1(cu8)	laat-1(qx42)	laat-1(qx42);pyr-1(cu8)
99.34	3.38	81.9	50.39	92.05	94.03
100	0	84.38	48.65	90.77	86.79
98	0	86.11	53.39	88.18	94.17
The numerical data are analyzed by GraphPad Prism 5 and represented as a bar graph in Figure 6A.

## Sheet: Figure6B-Embryonic lethality
% of viable embryos
WT	umps-1(mn160);rnst-2(qx245)	rnst-2(qx245)	umps-1(mn160)	laat-1(qx42)	laat-1(qx42);umps-1(mn160)
99.34	0	81.9	68.42	92.05	62.22
100	0	84.38	79.73	90.77	79.67
98	0	86.11	79.4	88.18	60.6
	0		78.18
The numerical data are analyzed by GraphPad Prism 5 and represented as a bar graph in Figure 6B.

## Sheet: Figure6C-with U
% of viable embryos
WT	pyr-1(cu8)	rnst-2(qx245)	pyr-1(cu8);rnst-2(qx245)	WT+U	pyr-1(cu8)+U	rnst-2(qx245)+U	pyr-1(cu8);rnst-2(qx245)+U
100	50.39	81.9	3.38	96.23	100	81.1	97.56
97.13	48.65	84.38	0	98.4	99	79.38	97.53
100	53.39	86.11	0	100	100	84.31	90.46
				100	100
The numerical data are analyzed by GraphPad Prism 5 and represented as a bar graph in Figure 6C.

## Sheet: Figure6D-with U
% of viable embryos
WT	umps-1(mn160)	rnst-2(qx245)	umps-1(mn160);rnst-2(qx245)	umps-1(mn160)+U	rnst-2(qx245)+U	umps-1(mn160);rnst-2(qx245)+U
100	68.42	81.9	0	100	81.1	23.05
97.13	79.73	84.38	0	100	79.38	30.37
100	79.4	86.11	0	92.66	84.31	25.89
	78.18		0	93.78	66.97
The numerical data are analyzed by GraphPad Prism 5 and represented as a bar graph in Figure 6D.

## Sheet: Figure6E-with C
% of viable embryos
WT	pyr-1(cu8)	rnst-2(qx245)	pyr-1(cu8);rnst-2(qx245)	WT+C	pyr-1(cu8)+C	rnst-2(qx245)+C	pyr-1(cu8);rnst-2(qx245)+C
100	50.39	81.9	3.38	70.4	100	87.3	49.81
97.13	48.65	84.38	0	60.24	66.8	64.32	50.72
100	53.39	86.11	0	64	72.03	72.48	53.44
					100
The numerical data are analyzed by GraphPad Prism 5 and represented as a bar graph in Figure 6E.

## Sheet: Figure6F-with C
% of viable embryos
WT	umps-1(mn160)	rnst-2(qx245)	umps-1(mn160);rnst-2(qx245)	umps-1(mn160)+C	rnst-2(qx245)+C	umps-1(mn160);rnst-2(qx245)+C
100	68.42	81.9	0	100	87.3	32.95
97.13	79.73	84.38	0	100	64.32	24.66
100	79.4	86.11	0	93.98	72.48	18.09
	78.18		0	90.48
The numerical data are analyzed by GraphPad Prism 5 and represented as a bar graph in Figure 6F.
