# Supplementary material for: Autophagy-dependent ribosomal RNA degradation is essential for maintaining nucleotide homeostasis during C. elegans development
Source: eLife. 2018 Aug 13;7:e36588. doi: 10.7554/eLife.36588 (PMC6101943; doi:10.7554/eLife.36588)
Supplement: Figure 6—source data 2. [file elife-36588-fig6-data2.xlsx]

## Sheet: Figure6-S1A-pyr-1 lethality
% of viable embryos
WT	pyr-1(cu8)	rnst-2(bp555)	pyr-1(cu8);rnst-2(bp555)
99.34	50.39	77.44	0
100	48.65	85	0
98	53.39	69.43	0
		71.77
		85.58
The numerical data are analyzed by GraphPad Prism 5 and represented as a bar graph in Figure 6-figure supplement 1A.

## Sheet: Figure6-S1B-umps-1 lethality
% of viable embryos
WT	umps-1(mn160)	rnst-2(bp555)	umps-1(mn160);rnst-2(bp555)
99.34	68.42	77.44	1.12
100	79.73	85	3.67
98	79.4	69.43	1.18
	78.18	71.77
		85.58
The numerical data are analyzed by GraphPad Prism 5 and represented as a bar graph in Figure 6-figure supplement 1B.

## Sheet: Figure6-S1C-pyr-1;lmp-1
% of viable embryos
WT	pyr-1(cu8)	lmp-1(nr2045)	pyr-1(cu8);lmp-1(nr2045)
98.7	57.4	98.44	57.5
99	54.69	99.58	83.14
94	46.75	98.06	58.8
The numerical data are analyzed by GraphPad Prism 5 and represented as a bar graph in Figure 6-figure supplement 1C.

## Sheet: Figure6-S1D-umps-1;lmp-1
% of viable embryos
WT	umps-1(mn160)	lmp-1(nr2045)	umps-1(mn160);lmp-1(nr2045)
98.7	79.41	98.44	73.95
99	79.74	99.58	54.96
94	70.72	98.06	35.33
The numerical data are analyzed by GraphPad Prism 5 and represented as a bar graph in Figure 6-figure supplement 1D.

## Sheet: Figure6-S1E-lmp-1 larval
% of L1 larvae growing to L4
WT	lmp-1(nr2045)
100	100
98	87
92	89
The numerical data are analyzed by GraphPad Prism 5 and represented as a bar graph in Figure 6-figure supplement 1E.

## Sheet: Figure6-S1F-pyr-1;daf-2
% of viable worms (20℃)
	WT	pyr-1(cu8)	daf-2(e1370)	pyr-1(cu8);daf-2(e1370)
0	100	100	100	100
2	100	99.2481	100	99.3243
4	100	96.2406	99.29	96.6216
6	97.48	93.985	96.43	89.8649
8	89.08	90.2256	93.57	87.8378
10	71.43	84.9624	93.57	84.4595
12	59.66	76.6917	92.86	78.3784
14	50.42	63.1579	89.29	66.2162
16	44.54	30.0752	87.14	63.5135
18	41.18	15.7895	86.43	58.1081
20	28.57	10.5263	82.86	52.7027
22	16.81	5.26316	81.43	48.6487
24	10.92	2.25564	80.71	46.6216
26	4.2	0.75188	77.14	39.8649
28	2.52	0.75188	76.43	37.1622
30	0.84	0.75188	75.71	30.4054
32	0.84	0.75188	74.29	29.0541
34	0	0	71.43	24.3243
36			70	18.9189
38			67.14	15.5405
40			62.86	14.8649
42			60.71	11.4865
44			58.57	10.1351
46			57.14	6.75676
48			51.43	2.02703
50			45.71	2.02703
52			40.71	2.02703
54			36.43	0.675676
56			29.29	0.675676
58			23.57	0.675676
60			17.14	0
62			14.29
64			8.57
66			6.43
68			4.29
70			2.14
72			0.71
74			0.71
76			0
78			2.23881
80			0.746269
82			0.746269
84			0
The numerical data are analyzed by GraphPad Prism 5 and represented as a graph in Figure 6-figure supplement 1F.

## Sheet: Figure6-S1G-Mean of pyr-1;daf-2
Mean lifespan (days) 20℃
WT	pyr-1(cu8)	daf-2(e1370)	pyr-1(cu8);daf-2(e1370)
17	16.1752	43.29	31.09
16.78	15.4286	37.67	24.05
16.76	16.6241	38.57	29.12
16.37
The numerical data are analyzed by GraphPad Prism 5 and represented as a bar graph in Figure 6-figure supplement 1G.

## Sheet: Figure6-S1H-laat-1;daf-2
% of viable worms (20℃)
	WT	laat-1(qx42)	daf-2(e1370)	laat-1(qx42);daf-2(e1370)
0	100	100	100	100
2	100	99.3056	100	100
4	100	96.5278	98.5075	97.9021
6	97.48	93.75	94.7761	96.5035
8	89.08	84.0278	89.5522	83.9161
10	71.43	78.4722	87.3134	79.021
12	59.66	74.3056	84.3284	74.8252
14	50.42	68.75	82.8358	73.4266
16	44.54	38.8889	78.3582	69.9301
18	41.18	22.2222	77.6119	68.5315
20	28.57	15.2778	75.3731	66.4336
22	16.81	4.16667	75.3731	63.6364
24	10.92	0.694444	71.6418	58.7413
26	4.2	0.694444	68.6567	56.6434
28	2.52	0.694444	67.9104	51.7482
30	0.84	0	67.1642	50.3496
32	0.84		65.6716	50.3496
34	0		61.9403	47.5525
36			56.7164	45.4545
38			52.9851	43.3566
40			47.7612	40.5594
42			44.7761	38.4615
44			35.0746	36.3636
46			32.0896	34.2657
48			32.0896	33.5664
50			31.3433	30.7692
52			28.3582	30.7692
54			23.8806	28.6713
56			23.1343	24.4755
58			20.8955	19.5804
60			14.9254	12.5874
62			10.4478	12.5874
64			5.97015	11.8881
66			3.73134	9.09091
68			2.98508	9.09091
70			2.98508	8.39161
72			2.98508	6.99301
74			2.23881	6.29371
76			2.23881	4.1958
78			2.23881	2.7972
80			0.746269	1.3986
82			0.746269	0.699301
84			0	0
86			0
The numerical data are analyzed by GraphPad Prism 5 and represented as a graph in Figure 6-figure supplement 1H.

## Sheet: Figure6-S1I- laat-1;daf-2
Mean lifespan (days) 20℃
WT	laat-1(qx42)	daf-2(e1370)	laat-1(qx42);daf-2(e1370)
17	16.2449	43.29	32.42
16.78	15.5556	37.67	35.64
16.76	16.3014	38.57	34.61
16.37
The numerical data are analyzed by GraphPad Prism 5 and represented as a bar graph in Figure 6-figure supplement 1I.
