# Supplementary material for: Autophagy-dependent ribosomal RNA degradation is essential for maintaining nucleotide homeostasis during C. elegans development
Source: eLife. 2018 Aug 13;7:e36588. doi: 10.7554/eLife.36588 (PMC6101943; doi:10.7554/eLife.36588)
Supplement: Figure 6—source data 3. [file elife-36588-fig6-data3.xlsx]

## Sheet: Figure6-S2A-Embryonic lethality
% of viable embryos
control RNAi	pyr-1 RNAi	lgg-1(bp500);control RNAi	lgg-1(bp500);pyr-1 RNAi	atg-2(bp576);control RNAi	atg-2(bp576);pyr-1 RNAi	atg-18(gk378);control RNAi	atg-18(gk378);pyr-1 RNAi	atg-9(bp564);control RNAi	atg-9(bp564);pyr-1 RNAi
98.48	97.95	67.6	0	79.3	4	23.79	0	91.2	17.1
100	98.62	55	0	80.5	6.4	38.71	0	87.5	12.8
99	98.16	66.26	0	78.74	0	27.67	0	81.28	7.54
The numerical data are analyzed by GraphPad Prism 5 and represented as a bar graph in Figure 6-figure supplement 2A.

## Sheet: Figure6-S2B-Embryonic lethality
% of viable embryos
control RNAi	umps-1 RNAi	lgg-1(bp500);control RNAi	lgg-1;umps-1 RNAi	atg-2(bp576);control RNAi	atg-2;umps-1 RNAi	atg-18(gk378);control RNAi	atg-18(gk378);umps-1 RNAii	atg-9(bp564);control RNAi	atg-9;umps-1 RNAi
98.48	99.14	67.6	2.1	79.3	13.9	23.79	0.4	91.2	61.08
100	100	55	6.5	80.5	28.9	38.71	0	87.5	49.28
99	94.93	66.26	0	78.74	1.7	27.67	0	81.28	24.73
The numerical data are analyzed by GraphPad Prism 5 and represented as a bar graph in Figure 6-figure supplement 2B.

## Sheet: Figure6-S2C-+U
% of viable embryos
	blank						+U
lgg-1(bp500)	63.18	57.72	40.06				67.46	60.8	63.91	62.64
atg-2(bp576)	90.06	81.58	83.68				91.3	78.7	89.62	70.06	79.49
atg-18(gk378)	26.23	40.1	37.3				65.78	46.56	39.19
The numerical data are analyzed by GraphPad Prism 5 and represented as a bar graph in Figure 6-figure supplement 2C.

## Sheet: Figure6-S2D-+C
% of viable embryos
	blank						+C
lgg-1(bp500)	63.18	57.72	40.06				49.04	67.99	61.73
atg-2(bp576)	90.06	81.58	83.68				88.71	85.04	83.11
atg-18(gk378)	26.23	40.1	37.3				64.31	53.23	50.88
The numerical data are analyzed by GraphPad Prism 5 and represented as a bar graph in Figure 6-figure supplement 2D.
